# Supplementary material for: Human transposon insertion profiling by sequencing (TIPseq) to map LINE-1 insertions in single cells
Source: PubMed Central journal article supplement (PMC7061987; doi:10.1098/rstb.2019.0335), 2020-02-10

## Fraction of L1Hs identified

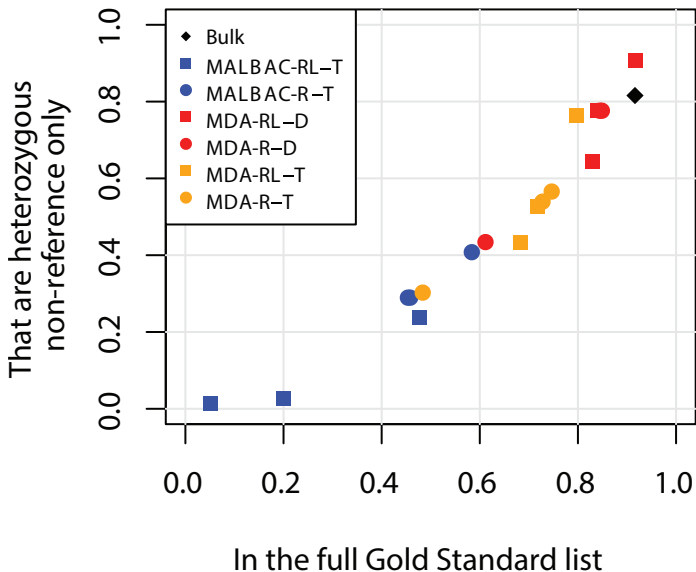

Supplement: rstb20190335supp4.pdf [file rstb20190335supp4.pdf]
